# Supplementary material for: New distributional data on ascidian fauna (Tunicata: Ascidiacea) from Mandapam coast, Gulf of Mannar, India
Source: Biodivers Data J. 2016 Mar 2;(4):e7855. doi: 10.3897/BDJ.4.e7855 (PMC4822072; doi:10.3897/BDJ.4.e7855)
Supplement: Supplementary material 1 — Members of various ascidian families recorded in the present study [file biodiversity_data_journal-4-e7855-s001.xlsx]

## Sheet: Sheet1
	Family	No. of Genus	No. of Species
	Perophoridae	1	3
	Styelidae	2	2
	Pyuridae	1	2
	Polycitoridae	1	4
	Polyclinidae	3	7
	Didemnidae	3	8
